# Supplementary material for: Update 2016–2018 of the Nationwide Danish Fungaemia Surveillance Study: Epidemiologic Changes in a 15-Year Perspective
Source: J Fungi (Basel). 2021 Jun 19;7(6):491. doi: 10.3390/jof7060491 (PMC8235436; doi:10.3390/jof7060491)
Supplement: Supplementary file 1 [file jof-07-00491-s001.zip › jof-1254181-supplementary.pdf]

## Supplementary Material

# Update 2016–2018 of the Nationwide Danish Fungaemia Surveillance Study: Epidemiologic Changes in a 15-Year Perspective

**Table S1.** Centre based data. Species distribution, blood culture systems and episode rates at the ten clinical microbiological departments in 2016 to 2018.

| Species                            | Rigshospitalet | Hvidovre | Herlev | Slagelse | Sønderborg | Esbjerg                 | Vejle                    | Århus | Ålborg | Odense |
|------------------------------------|----------------|----------|--------|----------|------------|-------------------------|--------------------------|-------|--------|--------|
| Number of isolates                 | 215            | 175      | 163    | 177      | 21         | 26                      | 60                       | 258   | 149    | 210    |
| <b>Species distribution</b>        |                |          |        |          |            |                         |                          |       |        |        |
| <i>C. albicans</i>                 | 34.4%          | 40.6%    | 40.5%  | 39.5%    | 33.3%      | 34.6%                   | 48.3%                    | 48.4% | 46.3%  | 43.8%  |
| <i>C. dubliniensis</i>             | 10.2%          | 6.3%     | 3.7%   | 5.1%     | 0.0%       | 0.0%                    | 3.3%                     | 3.9%  | 2.7%   | 4.3%   |
| <i>C. glabrata</i>                 | 24.7%          | 26.9%    | 38.0%  | 36.2%    | 42.9%      | 57.7%                   | 26.7%                    | 28.7% | 36.9%  | 34.3%  |
| <i>C. krusei</i>                   | 8.8%           | 6.9%     | 3.1%   | 4.0%     | 0.0%       | 0.0%                    | 3.3%                     | 6.2%  | 2.7%   | 3.8%   |
| <i>C. parapsilosis</i>             | 6.5%           | 2.9%     | 5.5%   | 2.8%     | 4.8%       | 7.7%                    | 0.0%                     | 3.5%  | 6.0%   | 3.8%   |
| <i>C. tropicalis</i>               | 4.7%           | 6.9%     | 3.7%   | 6.8%     | 0.0%       | 0.0%                    | 13.3%                    | 3.9%  | 2.7%   | 6.2%   |
| <i>Candida</i> spp.                | 7.0%           | 7.4%     | 4.3%   | 4.0%     | 9.5%       | 0.0%                    | 3.3%                     | 3.9%  | 2.7%   | 2.4%   |
| Other fungi                        | 3.7%           | 2.3%     | 1.2%   | 1.7%     | 9.5%       | 0.0%                    | 1.7%                     | 1.6%  | 0.0%   | 1.4%   |
| Blood culture systeme <sup>1</sup> | BT             | BA*      | BT**   | BA       | BA         | BA (6 ms)<br>BT (30 ms) | BA (18 ms)<br>BT (18 ms) | BA    | BT     | BA     |
| Proportion of patients < 50 years  | 30.8%          | 11.6%    | 3.9%   | 10.1%    | 5%         | 12%                     | 9.6%                     | 14.3% | 13.8%  | 15.2%  |
| Episodes (n)                       | 207            | 174      | 162    | 169      | 21         | 26                      | 55                       | 250   | 139    | 199    |
| <b>Incidence</b>                   |                |          |        |          |            |                         |                          |       |        |        |
| /100.000 inhabitants               | N/A            | 5.62     | 6.97   | 6.75     | 3.04       | 3.94                    | 6.23                     | 6.39  | 7.89   | 14.55  |
| /1000 discharges                   | 0.62           | 0.33     | 0.26   | 0.24     | 0.21       | 0.27                    | 0.38                     | 0.31  | 0.40   | 0.69   |
| /10.000 bed days                   | 1.69           | 1.17     | 0.93   | 0.98     | 0.77       | 0.85                    | 1.09                     | 1.07  | 0.59   | 1.94   |

<sup>1</sup> BA: BacT/ALERT, BT: BACTEC. \* Selected departments used BACTEC (BT). \*\* Selected departments used BacT/ALERT (BA). ms: months. Rigshospitalet is a referral hospital.

**Table S2.** Number of patients related to age groups.

| Age Group | Number of Patients | % of All |
|-----------|--------------------|----------|
| <1        | 17                 | 1.3%     |
| 1–9       | 17                 | 1.3%     |
| 10–19     | 15                 | 1.1%     |
| 20–29     | 19                 | 1.4%     |
| 30–39     | 34                 | 2.6%     |
| 40–49     | 82                 | 6.3%     |
| 50–59     | 179                | 13.7%    |
| 60–69     | 269                | 20.5%    |
| 70–79     | 423                | 32.3%    |
| 80–89     | 218                | 16.6%    |
| 90+       | 38                 | 2.9%     |

**Table S3.** *p*-values for comparisons of episodes in relation to number of inhabitants in patient groups.

| Males             |                 | Females           |                 |
|-------------------|-----------------|-------------------|-----------------|
| Age Group (Years) | <i>p</i> -Value | Age Group (Years) | <i>p</i> -Value |
| <1                | 0.000           | <1                | 0.002           |
| 1–9               | 0.000           | 1–9               | 0.000           |
| 10–19             | 0.000           | 10–19             | 0.000           |
| 20–29             | 0.000           | 20–29             | 0.000           |
| 30–39             | 0.000           | 30–39             | 0.000           |
| 40–49             | 0.000           | 40–49             | 0.000           |
| 50–59             | 0.000           | 50–59             | 0.000           |
| 60–69             | 0.000           | 60–69             | 0.000           |
| 70–79             | 0.006           | 70–79             | 0.018           |
| 80–89             | 0.100           | 80–89*            |                 |
| 90+*              |                 | 90+               | 0.032           |

A poisson regression analysis was used. \*Reference group in which number of episodes per 100,000 inhabitant was highest.

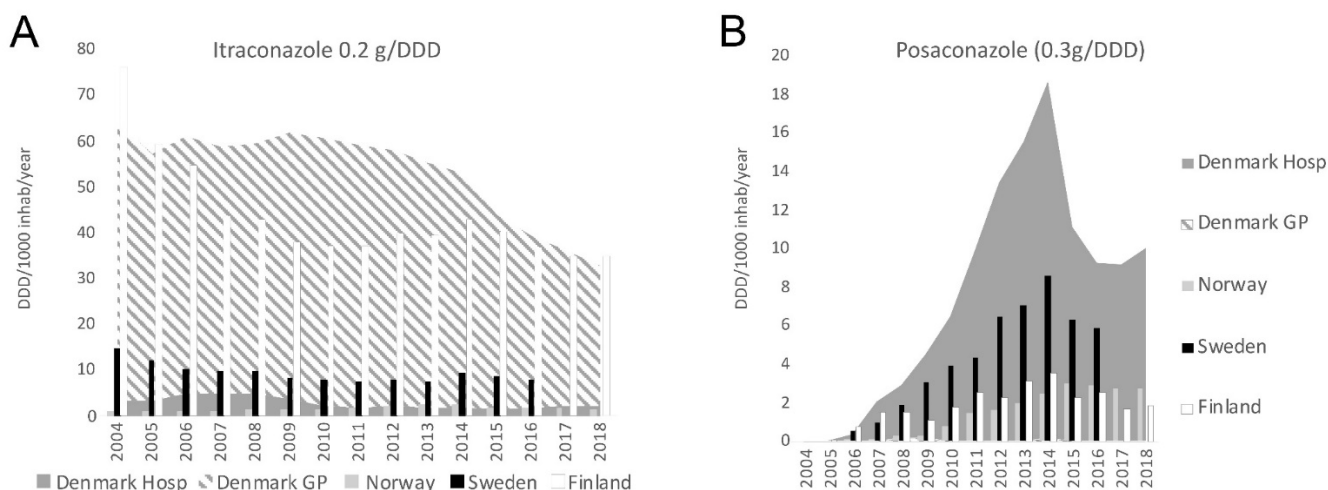

**Figure S1.** Annual consumption of itraconazole and posaconazole shown in DDDs per 1000 inhabitants per year in 2004 to 2018. For posaconazole, new formulations (iv and enterotablet; maintenance dose 300 mg/day as compared to 800 mg/day for the initial oral suspension) were introduced in 2014. In 2017, the DDD was changed from 0.8 g to 0.3 g. [https://www.whooc.no/atc\\_ddd\\_alterations\\_\\_cumulative/ddd\\_alterations/](https://www.whooc.no/atc_ddd_alterations__cumulative/ddd_alterations/) (Accessed on 17 June 2021). This resulted in a higher DDD than previously measured, especially for the years prior to 2014 with exclusive use of oral suspension. Detailed data based on posaconazole formulations from 2004 to 2015 are shown in the surveillance by Astvad et al., and data from 2004 to 2015 have previously been published [10].
